# Supplementary material for: Hydrogen inhalation alleviates nonalcoholic fatty liver disease in metabolic syndrome rats
Source: PubMed Central journal article supplement — Mol Med Rep. 2020 Jul 28;22(4):2860–8. doi: 10.3892/mmr.2020.11364 (PMC7453621; doi:10.3892/mmr.2020.11364), 2020-07-28
Supplement: Supplementary_Data.pdf [file Supplementary_Data.pdf]

Figure S1. Macroscopic appearance of the liver in the different groups. (A) Control group; (B) high fat and fructose diet group; (C) low H<sub>2</sub> group; (D) high H<sub>2</sub> group.

**A**

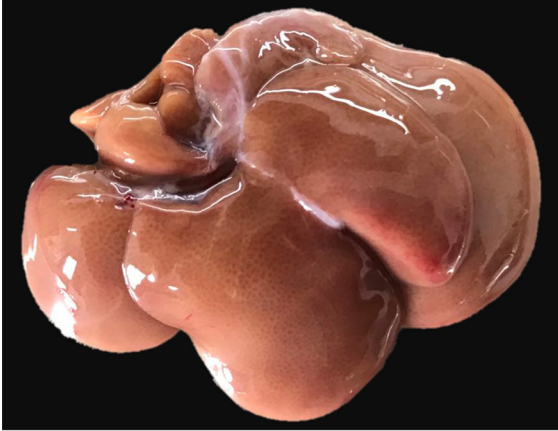

**B**

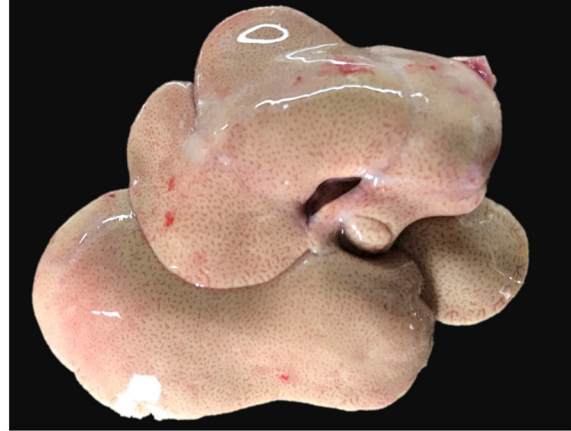

**C**

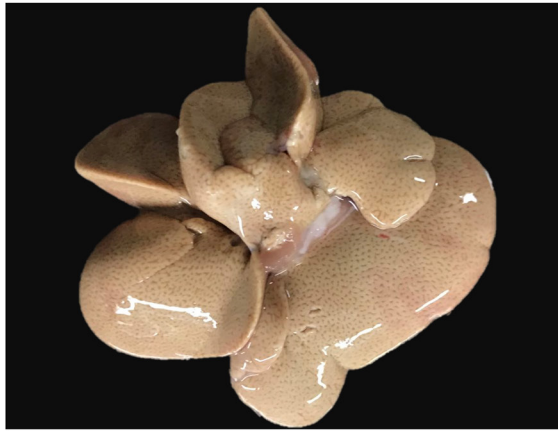

**D**

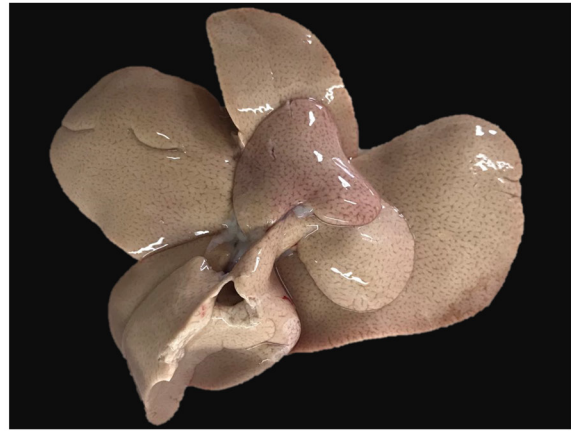

Table SI. Conditions for tandem mass spectrometry analysis of lipid species.

| Lipid species          | Precursor→Product Ions (m/z) | Collision energy (eV) | Declustering potential (V) |
|------------------------|------------------------------|-----------------------|----------------------------|
| FC                     | 369.3→147.1                  | 25                    | 110                        |
| d7-cho (IS)            | 376.3→147.1                  | 33                    | 80                         |
| CE 16:0                | 642.6→369.4                  | 20                    | 40                         |
| CE 16:1                | 640.6→369.4                  | 20                    | 40                         |
| CE 18:0                | 670.6→369.4                  | 20                    | 40                         |
| CE 18:1                | 668.6→369.4                  | 20                    | 40                         |
| CE 18:2                | 666.6→369.4                  | 20                    | 40                         |
| CE 18:3                | 664.6→369.4                  | 20                    | 40                         |
| CE 20:3                | 692.6→369.4                  | 20                    | 40                         |
| CE 20:4                | 690.6→369.4                  | 20                    | 40                         |
| CE 20:5                | 688.6→369.4                  | 20                    | 40                         |
| CE 22:6                | 714.6→369.4                  | 20                    | 40                         |
| CE 17:0 (IS)           | 656.7→369.4                  | 20                    | 40                         |
| TG 17:0/17:0/17:0 (IS) | 866.8→579.6                  | 30                    | 95                         |
| TG 48:0                | 824.8→551.5                  | 30                    | 95                         |
| TG 48:2                | 820.8→549.5                  | 30                    | 95                         |
| TG 48:3                | 818.8→547.5                  | 30                    | 95                         |
| TG 49:1                | 836.8→563.5                  | 30                    | 95                         |
| TG 50:1                | 851.8→552.5                  | 30                    | 95                         |
| TG 50:2                | 846.8→547.5                  | 30                    | 95                         |
| TG 50:3                | 846.8→575.6                  | 30                    | 95                         |
| TG 50:4                | 844.8→599.5                  | 30                    | 95                         |
| TG 51:2                | 862.8→589.6                  | 30                    | 95                         |
| TG 52:2                | 876.8→603.6                  | 30                    | 95                         |
| TG 52:3                | 874.8→603.6                  | 30                    | 95                         |
| TG 52:4                | 872.8→599.6                  | 30                    | 95                         |
| TG 54:2                | 904.9→603.6                  | 30                    | 95                         |
| TG 54:4                | 900.8→599.5                  | 30                    | 95                         |
| TG 54:5                | 898.9→599.6                  | 30                    | 95                         |
| TG 54:6                | 896.9→599.6                  | 30                    | 95                         |
| TG 56:6                | 924.9→603.6                  | 30                    | 95                         |
| TG 56:8                | 920.9→599.6                  | 30                    | 95                         |

FC, free cholesterol; CE, cholesteryl ester; TG, triacylglycerol.
